# Supplementary material for: Vitamin D Receptor Protects against Radiation-Induced Intestinal Injury in Mice via Inhibition of Intestinal Crypt Stem/Progenitor Cell Apoptosis
Source: MDPI journal article supplement (doi:10.3390/nu13092910), 2021-08-24
Supplement: s1 [file s1]

Table S1 Composition of the rescue diet as specified by manufacturer.

| Component (g/kg)                 | Weight (g) |
|----------------------------------|------------|
| Casein                           | 200        |
| L-Cystine                        | 3          |
| Lactose                          | 200        |
| Cellulose                        | 50         |
| Soybean oil                      | 70         |
| Vitamin and trace element premix | 10         |
| Calcium carbonate                | 18         |
| Calcium phosphate                | 44         |
| Starch                           | 193        |
| Maltodextrin                     | 112        |
| Sucrose                          | 100        |

Table S2 siRNA sequences.

| Name        | Sense (5'-3')       | Antisense (5'-3')   |
|-------------|---------------------|---------------------|
| si-Pmaip1-1 | CAGGAAGAUUGGAGAUAAA | UUUAUCUCCAAUCUCCUG  |
| si-Pmaip1-2 | CGAAAGAGCACGAUGAGAA | UUCUCAUCGUGCUCUUUCG |
| si-Pmaip1-3 | CCGGAGAAUUGGAGACAAA | UUUGUCUCCAAUUCUCCGG |

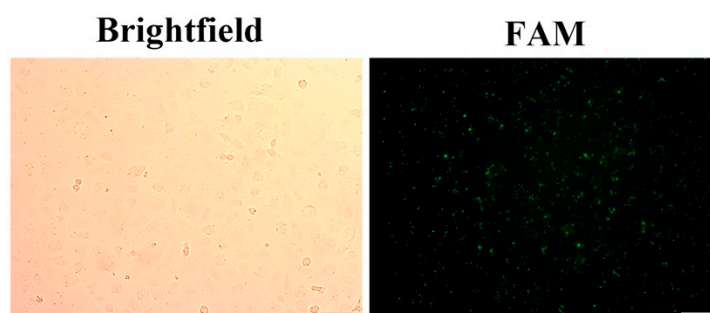

Figure S1. Transfection efficiency in IEC-6 cells determined by fluorescence microscope. The representative image shows the FAM fluorescence in the same site in the brightfield. Scale bar, 20  $\mu$ m.

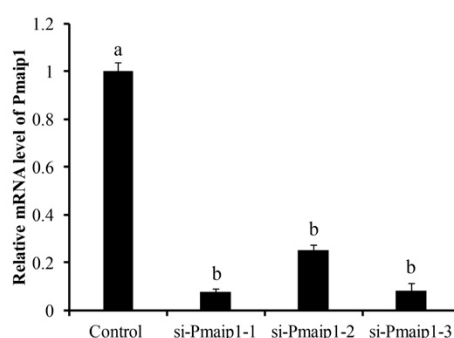

Figure S2. RT-qPCR results testing the knockdown efficiency of different pairs of si-Pmaip1 in IEC-6 cells at 24 h after si-Pmaip1 transfection. IEC-6 cells exposed to si-Pmaip1-1 and si-Pmaip1-2 had high mortality. The statistical analysis was performed by one-way ANOVA (lowercase letters indicate significant differences,  $p < 0.05$ ).
